# Supplementary material for: Carbonatite-induced petit-spot melts squeezed upward from the asthenosphere beneath the Jurassic Pacific Plate
Source: Copernicus journal article supplement (doi:10.5194/egusphere-2023-1499), 2023-08-29
Supplement: Supplementary file 1 [file egusphere-2023-1499-supplement.pdf]

## **Contents of this file**

Figures S1 to S9  
Captions for Supplementary Tables S1 to S4

## **Introduction**

This supporting information contains all of the Supplementary Figures with captions for this manuscript.

Table captions for Supplementary Tables also contains. Supplementary Tables are included as separated spreadsheets (.xlsx).

1 **Supplementary figures**

2

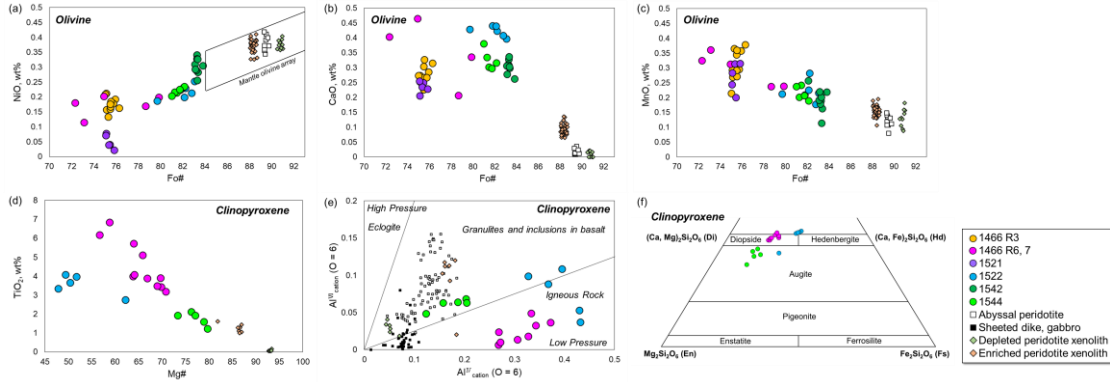

3

4 Fig. S1. Mineral compositions of olivine (a)–(c) and clinopyroxene (d)–(f) in this  
 5 study. (a) Forsterite number (Fo#:  $Mg\# = Mg/(Mg+Fe^{2+})$  for cation  
 6 ratio of olivine) vs NiO content of olivine. Mantle olivine array is after  
 7 Takahashi et al. (1987). (b) Fo# vs CaO content of olivine. (c) Fo# vs  
 8 MnO content of olivine. (d) Mg# vs TiO<sub>2</sub> content of clinopyroxene. (e)  
 9 Al<sup>IV</sup> vs Al<sup>VI</sup> (cation ratio when total oxygen is six) of clinopyroxene. (f)  
 10 Ca–Mg–Fe pyroxene classification diagram from Morimoto (1988).  
 11 The compiled abyssal peridotite is from Regelous et al. (2016),  
 12 sheeted dike–gabbro by ODP Hole 1256D is from Yamazaki et al.  
 13 (2009), peridotite xenoliths from the petit-spot knoll of 6K#1466R6-  
 14 001 and R7-003 in this study is from Mikuni et al. (2022).

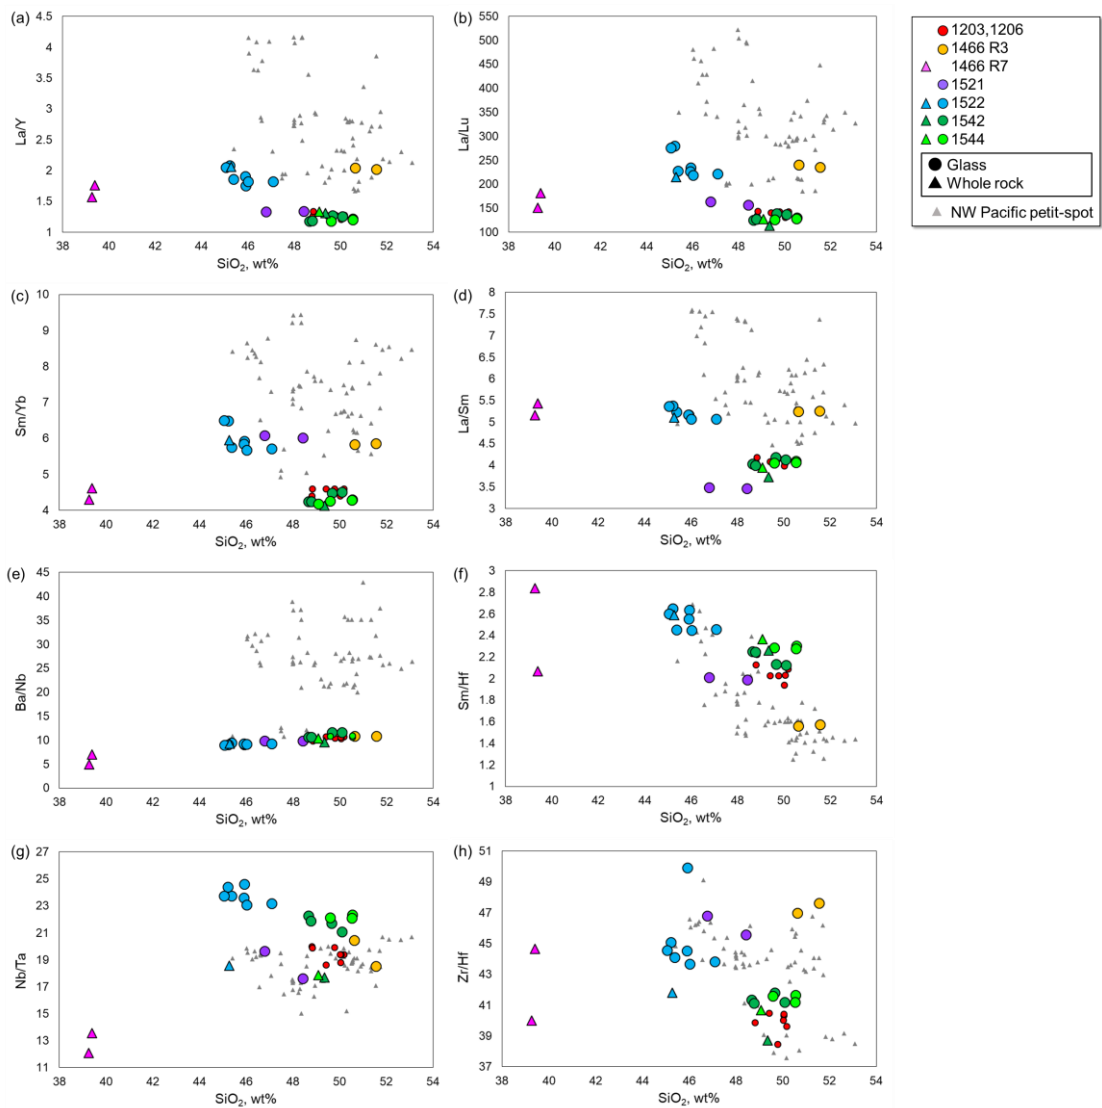

15

16 Fig. S2 Selected trace-element ratios against SiO<sub>2</sub> content.

17

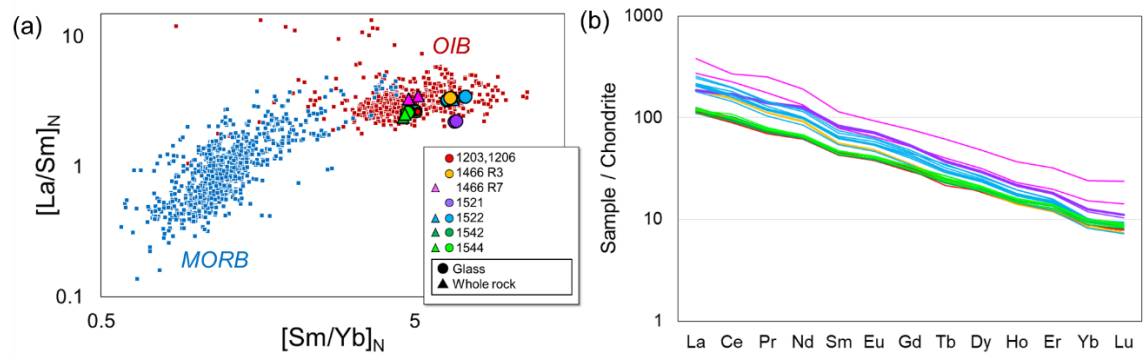

18

19 Fig. S3 The REEs characteristics of the western Pacific petit-spot basalts. (a) CI  
20 Chondrite normalized Sm/Yb and La/Sm variations. Chondrite value is after Sun

21 and McDonough (1989). (b) CI Chondrite normalized REE patterns. The color of  
 22 each line corresponds to that of the symbols in (a). The data of OIB and MORB  
 23 are from Stracke et al. (2022) as “Expert datasets” in GEOROC database  
 24 (<https://georoc.eu/georoc/new-start.asp>).  
 25

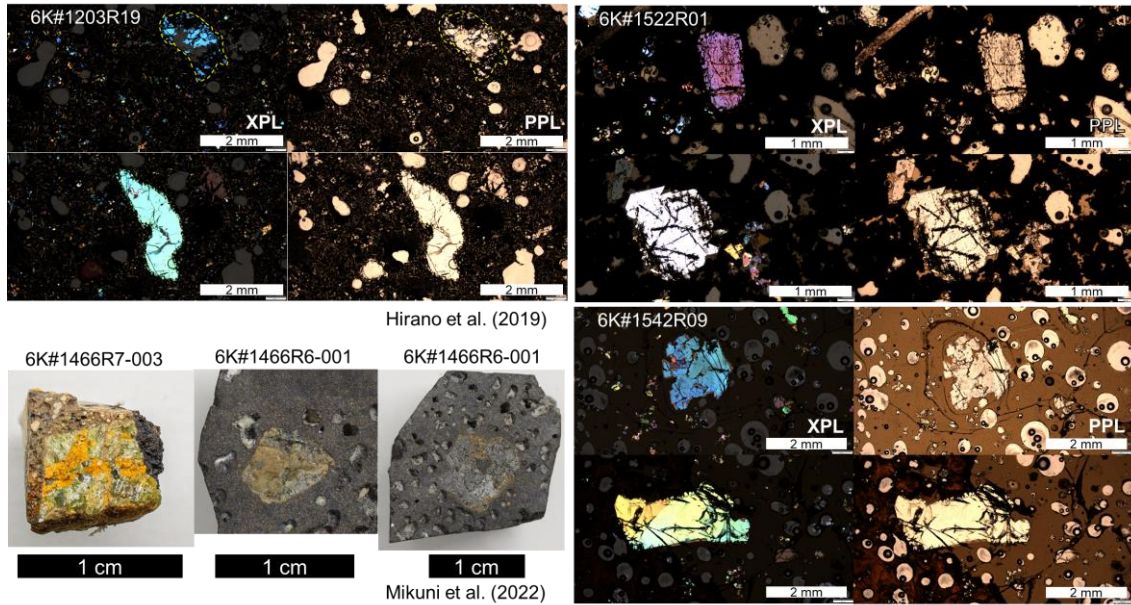

26  
 27 Fig. S4 Photomicrographs and photos of xenocrysts and xenoliths in this study  
 28 samples.  
 29

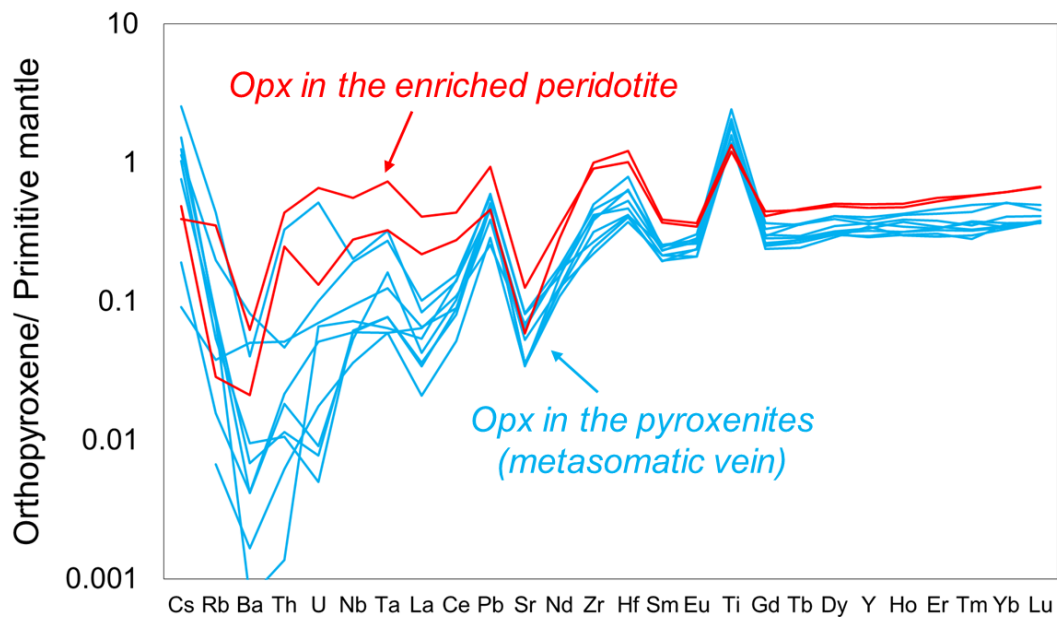

30  
 31 Fig. S5 Primitive mantle-normalized trace-element compositions of  
 32 orthopyroxene in the metasomatized ultramafic xenoliths. The enriched

33 peridotite and the pyroxenite xenoliths were reported from the petit-spot knoll in  
34 this study area (investigated by the 6K#1466R6-001, R7-001 and R7-003  
35 dives). The data are provided in Mikuni et al. (2022).

---

37

### 38 **Olivine maximum fractionation model**

39

40 Primary composition of selected samples were calculated based on “olivine  
41 maximum fractionation model” generally based on the method of Machida et al.  
42 (2008) to check the primitiveness of the 6K#1522 petit-spot basalts. First, we  
43 calculated the composition of olivine in equilibrium with the analyzed melt  
44 (glass) composition based on the exchange partition coefficients of Fe–Mg  
45 ( $K_d^{Fe-Mg}_{\text{olivine-melt}}$ ) and Ni–Mg ( $K_d^{Ni-Mg}_{\text{olivine-melt}}$ ) from Takahashi (1986) as  
46 described below. Then, the calculated composition of olivine were added to the  
47 analyzed melt composition in a weight ratio of 1:99. This procedure was  
48 repeated until the NiO content and Fo# of olivine reached the “mantle olivine  
49 array” (Takahashi, 1986). Assumption in the calculation are as follows:

50  $K_d^{Fe-Mg}_{\text{olivine-melt}} = 0.27 + 0.03(N^{\text{MgO}}_{\text{melt}} + 0.33N^{\text{FeO}}_{\text{melt}})$ ,  $K_d^{Ni-Mg}_{\text{olivine-melt}} = 2.8 -$   
51  $0.033(N^{\text{MgO}}_{\text{melt}} + 0.33N^{\text{FeO}}_{\text{melt}})$ ,  $\text{Fe}^{3+}/(\text{Fe}^{2+} + \text{Fe}^{3+})$  is constant of 0.1.  $N^{\text{MgO}}_{\text{melt}}$  and  
52  $N^{\text{FeO}}_{\text{melt}}$  are molar fraction of MgO and FeO of melt, respectively.

53

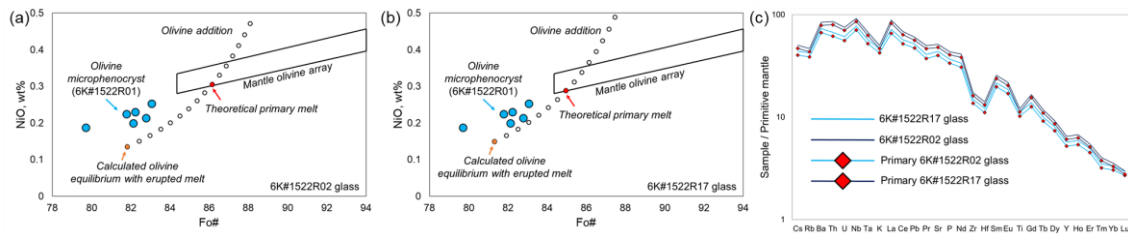

54  
 55 Fig. S6 The olivine maximum fractionation model. Selected two samples of  
 56 6K#1522R02 (a) and 6K#1522R17 (b) were back-calculated to “mantle olivine  
 57 array” by addition of olivine. (c) Primitive mantle normalized trace-element  
 58 patterns of analyzed values and calculated primary magma.

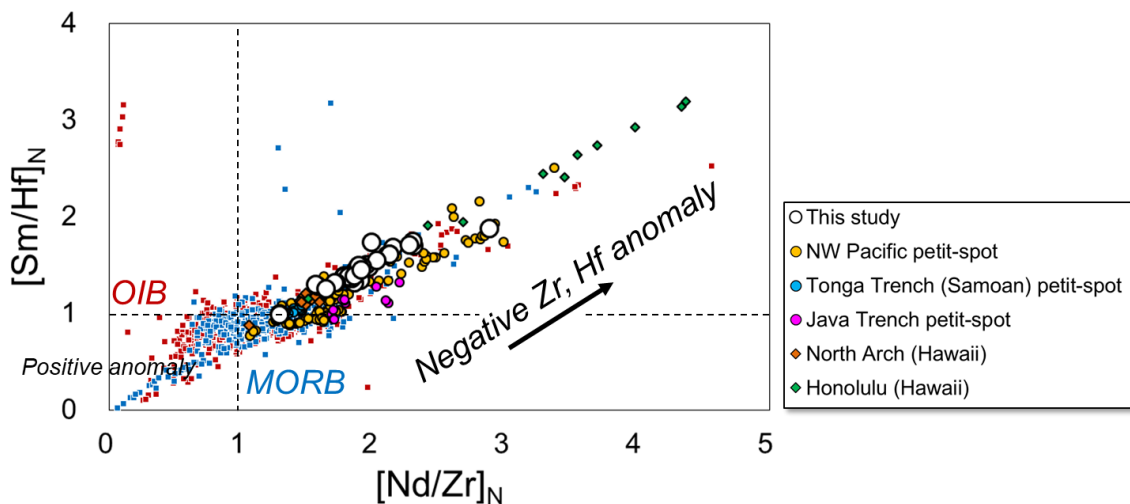

61  
 62 Fig. S7 Primitive mantle normalized Nd/Zr vs. Sm/Hf diagram. This study  
 63 samples were showed as white circles. Compiled data and references are as  
 64 follows: NW Pacific petit-spots (yellow circles); Hirano and Machida (2022),  
 65 petit-spots off Tonga Trench (blue circles); Reinhard et al. (2019), petit-spots off  
 66 Java Trench (pink circles); Taneja et al. (2016) and Falloon et al. (2022),  
 67 Hawaiian North Arch lavas and Honolulu volcanics (blown and green diamonds,  
 68 respectively); Clague and Frey (1982), Clague et al. (1990), and Yang et al.  
 69 (2003). Data of OIB and MORB (red and blue cubes, respectively) are from  
 70 Stracke et al. (2022) as “Expert datasets” in GEOROC database  
 71 (<https://georoc.eu/georoc/new-start.asp>).

72

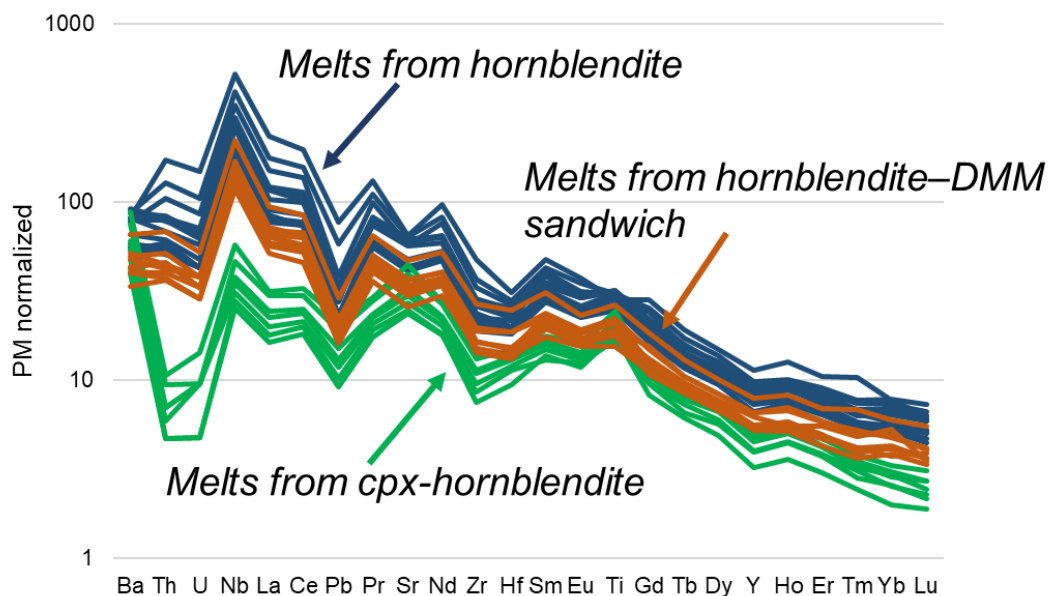

73  
74  
75  
76  
77  
78  
79

Fig. S8 Primitive mantle normalized trace-element patterns of the produced melts from experiments of Pilet et al. (2008). Dark blue lines, green lines, and brown lines are melts from hornblendite, cpx-hornblendite, and hornblendite–DMM sandwich, respectively. Details are provided in Pilet et al. (2008).

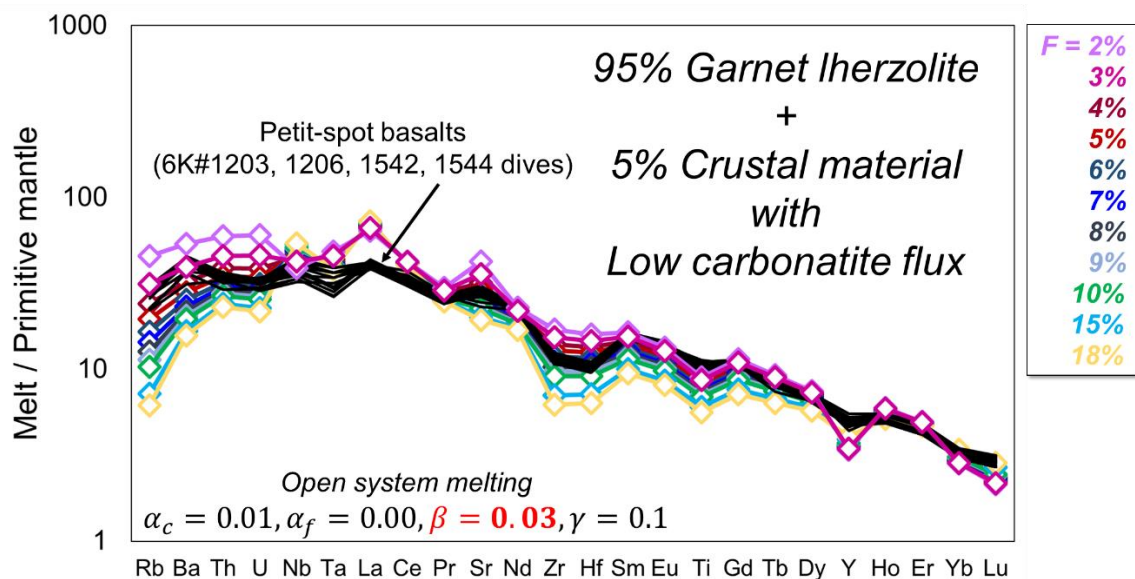

80  
81  
82  
83  
84  
85  
86  
87  
88

Fig. S9 Geochemical modeling for the primitive mantle (PM)-normalized trace-element pattern for each degree of melting. The calculated hypothetical melts are partial melts of 5% crustal component-bearing garnet lherzolite with carbonatite influx. Carbonatite influx rate ( $\beta$ ) of 0.03 is lower than those consistent with 6K#1522 basalts (Figs. 11a and b). A melt-separation rate ( $\gamma$ ) is 0.1. The trace-element composition of the western Pacific petit-spot basalts from the 6K#1203, 1206, 1542, and 1544 dives are shown as black lines for comparison. Used parameters were same as Fig. 11.





Table S1  
Mineral compositions: Clinopyroxene

| No.                                                    | YK16-01<br>6K#1466R6-001 |       |       |       |       |       |       |        |       | YK18-08<br>6K#1521R04 |       |       |       |        |        | YK19-05S<br>6K#1544R04 |        |       |  |  |  |
|--------------------------------------------------------|--------------------------|-------|-------|-------|-------|-------|-------|--------|-------|-----------------------|-------|-------|-------|--------|--------|------------------------|--------|-------|--|--|--|
|                                                        | 31                       | 32    | 33    | 34    | 36    | 37    | 39    | 40     | 61    | 70                    | 71    | 72    | 73    | 22     | 23     | 24                     | 25     | 26    |  |  |  |
| SiO <sub>2</sub>                                       | 45.07                    | 42.27 | 42.67 | 43.23 | 44.53 | 43.76 | 45.12 | 42.67  | 40.59 | 39.39                 | 38.95 | 41.29 | 42.56 | 48.52  | 51.39  | 48.99                  | 50.07  | 47.98 |  |  |  |
| TiO <sub>2</sub>                                       | 3.19                     | 3.89  | 3.99  | 4.08  | 3.44  | 3.90  | 3.49  | 5.11   | 3.34  | 4.08                  | 3.97  | 3.66  | 2.74  | 2.12   | 1.22   | 1.92                   | 1.60   | 1.92  |  |  |  |
| Al <sub>2</sub> O <sub>3</sub>                         | 6.06                     | 8.13  | 7.47  | 8.41  | 6.17  | 7.00  | 6.46  | 9.09   | 10.80 | 10.26                 | 9.87  | 9.77  | 9.21  | 6.21   | 3.99   | 5.75                   | 5.08   | 6.07  |  |  |  |
| Cr <sub>2</sub> O <sub>3</sub>                         | 0.01                     | 0.00  | 0.00  | 0.02  | 0.00  | 0.01  | 0.04  | 0.00   | 0.06  | 0.07                  | 0.07  | 0.08  | 0.04  | 0.24   | 0.51   | 0.36                   | 0.47   | 0.06  |  |  |  |
| FeO                                                    | 9.16                     | 9.49  | 10.66 | 10.32 | 9.30  | 9.14  | 9.36  | 9.56   | 13.75 | 13.85                 | 13.40 | 13.26 | 12.19 | 8.04   | 7.94   | 8.21                   | 7.33   | 9.43  |  |  |  |
| MnO                                                    | 0.22                     | 0.19  | 0.16  | 0.14  | 0.12  | 0.09  | 0.10  | 0.14   | 0.18  | 0.14                  | 0.13  | 0.11  | 0.24  | 0.09   | 0.17   | 0.20                   | 0.17   | 0.19  |  |  |  |
| MgO                                                    | 12.44                    | 10.72 | 10.54 | 10.33 | 12.04 | 11.77 | 11.65 | 10.34  | 7.07  | 7.58                  | 8.05  | 7.55  | 11.24 | 14.45  | 17.48  | 15.46                  | 15.40  | 14.57 |  |  |  |
| CaO                                                    | 22.03                    | 22.04 | 21.60 | 21.83 | 21.62 | 21.87 | 22.06 | 22.45  | 21.75 | 22.09                 | 21.99 | 21.49 | 17.95 | 20.28  | 17.55  | 18.75                  | 19.96  | 19.15 |  |  |  |
| Na <sub>2</sub> O                                      | 0.45                     | 0.58  | 0.58  | 0.60  | 0.44  | 0.51  | 0.50  | 0.61   | 0.85  | 0.68                  | 0.72  | 0.73  | 0.66  | 0.40   | 0.36   | 0.45                   | 0.36   | 0.39  |  |  |  |
| K <sub>2</sub> O                                       | 0.03                     | 0.04  | 0.05  | 0.02  | 0.07  | 0.01  | 0.03  | 0.02   | 0.05  | 0.01                  | 0.05  | 0.15  | 0.15  | 0.01   | 0.05   | 0.03                   | 0.00   | 0.02  |  |  |  |
| NiO                                                    | 0.00                     | 0.00  | 0.00  | 0.00  | 0.03  | 0.01  | 0.00  | 0.02   | 0.01  | 0.01                  | 0.00  | 0.01  | 0.01  | 0.03   | 0.01   | 0.04                   | 0.01   | 0.04  |  |  |  |
| Total                                                  | 98.67                    | 97.34 | 97.74 | 98.99 | 97.76 | 98.07 | 98.80 | 100.00 | 98.45 | 98.16                 | 97.20 | 98.09 | 96.98 | 100.39 | 100.66 | 100.15                 | 100.43 | 99.81 |  |  |  |
| cation ratio (O=6)                                     |                          |       |       |       |       |       |       |        |       |                       |       |       |       |        |        |                        |        |       |  |  |  |
| SiO <sub>2</sub>                                       | 1.73                     | 1.66  | 1.67  | 1.67  | 1.73  | 1.69  | 1.73  | 1.63   | 1.61  | 1.57                  | 1.57  | 1.63  | 1.67  | 1.80   | 1.88   | 1.81                   | 1.84   | 1.80  |  |  |  |
| TiO <sub>2</sub>                                       | 0.09                     | 0.11  | 0.12  | 0.12  | 0.10  | 0.11  | 0.10  | 0.15   | 0.10  | 0.12                  | 0.12  | 0.11  | 0.08  | 0.06   | 0.03   | 0.05                   | 0.04   | 0.05  |  |  |  |
| Al <sub>2</sub> O <sub>3</sub>                         | 0.27                     | 0.38  | 0.35  | 0.38  | 0.28  | 0.32  | 0.29  | 0.41   | 0.50  | 0.48                  | 0.47  | 0.46  | 0.43  | 0.27   | 0.17   | 0.25                   | 0.22   | 0.27  |  |  |  |
| Cr <sub>2</sub> O <sub>3</sub>                         | 0.00                     | 0.00  | 0.00  | 0.00  | 0.00  | 0.00  | 0.00  | 0.00   | 0.00  | 0.00                  | 0.00  | 0.00  | 0.00  | 0.01   | 0.01   | 0.01                   | 0.01   | 0.00  |  |  |  |
| FeO                                                    | 0.29                     | 0.31  | 0.35  | 0.33  | 0.30  | 0.30  | 0.30  | 0.31   | 0.45  | 0.46                  | 0.45  | 0.44  | 0.40  | 0.25   | 0.24   | 0.25                   | 0.23   | 0.29  |  |  |  |
| MnO                                                    | 0.01                     | 0.01  | 0.01  | 0.00  | 0.00  | 0.00  | 0.00  | 0.00   | 0.01  | 0.00                  | 0.00  | 0.00  | 0.01  | 0.00   | 0.01   | 0.01                   | 0.01   | 0.01  |  |  |  |
| MgO                                                    | 0.71                     | 0.63  | 0.62  | 0.59  | 0.70  | 0.68  | 0.67  | 0.59   | 0.42  | 0.45                  | 0.48  | 0.45  | 0.66  | 0.80   | 0.95   | 0.85                   | 0.84   | 0.81  |  |  |  |
| CaO                                                    | 0.91                     | 0.93  | 0.91  | 0.90  | 0.90  | 0.91  | 0.91  | 0.92   | 0.92  | 0.94                  | 0.95  | 0.91  | 0.76  | 0.80   | 0.69   | 0.74                   | 0.79   | 0.77  |  |  |  |
| Na <sub>2</sub> O                                      | 0.03                     | 0.04  | 0.04  | 0.05  | 0.03  | 0.04  | 0.04  | 0.04   | 0.07  | 0.05                  | 0.06  | 0.06  | 0.05  | 0.03   | 0.03   | 0.03                   | 0.03   | 0.03  |  |  |  |
| K <sub>2</sub> O                                       | 0.00                     | 0.00  | 0.00  | 0.00  | 0.00  | 0.00  | 0.00  | 0.00   | 0.00  | 0.00                  | 0.00  | 0.01  | 0.01  | 0.00   | 0.00   | 0.00                   | 0.00   | 0.00  |  |  |  |
| NiO                                                    | 0.00                     | 0.00  | 0.00  | 0.00  | 0.00  | 0.00  | 0.00  | 0.00   | 0.00  | 0.00                  | 0.00  | 0.00  | 0.00  | 0.00   | 0.00   | 0.00                   | 0.00   | 0.00  |  |  |  |
| Total cation                                           | 4.06                     | 4.06  | 4.06  | 4.05  | 4.05  | 4.05  | 4.04  | 4.04   | 4.08  | 4.09                  | 4.11  | 4.06  | 4.06  | 4.02   | 4.01   | 4.02                   | 4.01   | 4.03  |  |  |  |
| Mg# = 100(Mg/(Mg+Fe <sup>2+</sup> )) <sub>cation</sub> | 70.77                    | 66.83 | 63.81 | 64.09 | 69.78 | 69.64 | 68.93 | 65.84  | 47.83 | 49.40                 | 51.70 | 50.39 | 62.17 | 76.22  | 79.70  | 77.06                  | 78.92  | 73.36 |  |  |  |

97  
98

Table S1  
Mineral compositions: Plagioclase, FeTi oxide, spinel

| No.                            | YK16-01<br>6K#1466R3-001 |         |         |         |         |       |       |       |         | YK16-01<br>6K#1466R6-001 |       |         |         |  |  |
|--------------------------------|--------------------------|---------|---------|---------|---------|-------|-------|-------|---------|--------------------------|-------|---------|---------|--|--|
|                                | 8                        | 11      | 18      | 19      | 20      | 21    | 22    | 23    | 24      | 25                       | 26    | 27      | 28      |  |  |
| SiO <sub>2</sub>               | 0.11                     | 1.38    | 0.09    | 0.07    | 0.11    | 51.18 | 52.35 | 53.15 | 0.11    | 0.13                     | 15.01 | 0.19    | 0.13    |  |  |
| TiO <sub>2</sub>               | 10.68                    | 11.09   | 11.29   | 10.70   | 10.73   | 0.08  | 0.16  | 0.17  | 16.19   | 16.98                    | 13.20 | 17.69   | 16.81   |  |  |
| Al <sub>2</sub> O <sub>3</sub> | 7.16                     | 6.41    | 6.83    | 7.18    | 7.17    | 28.37 | 28.08 | 27.88 | 5.22    | 5.05                     | 8.40  | 4.99    | 5.10    |  |  |
| Cr <sub>2</sub> O <sub>3</sub> | 9.43                     | 6.15    | 6.72    | 9.20    | 8.94    | 0.00  | 0.00  | 0.00  | 1.08    | 0.06                     | 0.80  | 0.04    | 0.16    |  |  |
| FeO                            | 63.10                    | 65.08   | 64.81   | 62.66   | 62.54   | 0.78  | 0.73  | 0.75  | 69.02   | 70.32                    | 50.96 | 69.08   | 69.50   |  |  |
| MnO                            | 0.27                     | 0.29    | 0.34    | 0.24    | 0.29    | 0.03  | 0.00  | 0.00  | 5.27    | 0.38                     | 0.50  | 0.45    | 0.50    |  |  |
| MgO                            | 6.60                     | 7.65    | 6.50    | 6.39    | 6.58    | 0.12  | 0.14  | 0.12  | 4.47    | 4.83                     | 4.98  | 4.20    | 4.93    |  |  |
| CaO                            | 0.07                     | 0.05    | 0.03    | 0.11    | 0.20    | 12.05 | 11.55 | 11.64 | 0.04    | 0.11                     | 4.37  | 0.16    | 0.10    |  |  |
| Na <sub>2</sub> O              | 0.00                     | 0.00    | 0.00    | 0.00    | 0.00    | 4.29  | 4.50  | 4.49  | 0.04    | 0.05                     | 0.98  | 0.03    | 0.00    |  |  |
| K <sub>2</sub> O               | 0.04                     | 0.01    | 0.02    | 0.01    | 0.04    | 0.33  | 0.36  | 0.37  | 0.02    | 0.00                     | 0.64  | 0.07    | 0.04    |  |  |
| NiO                            | 0.20                     | 0.20    | 0.15    | 0.22    | 0.20    | 0.01  | 0.03  | 0.00  | 0.06    | 0.04                     | 0.04  | 0.04    | 0.05    |  |  |
| Total                          | 97.66                    | 98.29   | 96.78   | 96.79   | 96.79   | 97.24 | 97.88 | 98.55 | 97.52   | 97.96                    | 99.88 | 96.93   | 97.31   |  |  |
| Mineral species                | FeTi ox                  | FeTi ox | FeTi ox | FeTi ox | FeTi ox | Pl    | Pl    | Pl    | FeTi ox | FeTi ox                  | Spl   | FeTi ox | FeTi ox |  |  |
| cation ratio (O=24)            |                          |         |         |         |         |       |       |       |         |                          |       |         |         |  |  |
| SiO <sub>2</sub>               | 0.02                     | 0.32    | 0.02    | 0.02    | 0.03    | 7.19  | 7.29  | 7.34  | 0.03    | 0.03                     | 2.95  | 0.05    | 0.03    |  |  |
| TiO <sub>2</sub>               | 1.87                     | 1.92    | 2.01    | 1.89    | 1.89    | 0.01  | 0.02  | 0.02  | 2.89    | 3.03                     | 1.95  | 3.18    | 3.01    |  |  |
| Al <sub>2</sub> O <sub>3</sub> | 1.96                     | 1.74    | 1.90    | 1.99    | 1.98    | 4.70  | 4.61  | 4.54  | 1.46    | 1.41                     | 1.94  | 1.40    | 1.43    |  |  |
| Cr <sub>2</sub> O <sub>3</sub> | 1.73                     | 1.12    | 1.26    | 1.71    | 1.66    | 0.00  | 0.00  | 0.00  | 0.20    | 0.01                     | 0.12  | 0.01    | 0.03    |  |  |
| FeO                            | 12.27                    | 12.52   | 12.81   | 12.30   | 12.26   | 0.09  | 0.08  | 0.09  | 13.69   | 13.93                    | 8.37  | 13.79   | 13.84   |  |  |
| MnO                            | 0.05                     | 0.06    | 0.07    | 0.05    | 0.06    | 0.00  | 0.00  | 0.00  | 0.09    | 0.08                     | 0.08  | 0.09    | 0.10    |  |  |
| MgO                            | 2.29                     | 2.62    | 2.29    | 2.23    | 2.30    | 0.03  | 0.03  | 0.02  | 1.86    | 1.71                     | 1.46  | 1.49    | 1.75    |  |  |
| CaO                            | 0.02                     | 0.01    | 0.01    | 0.03    | 0.05    | 1.81  | 1.72  | 1.72  | 0.01    | 0.03                     | 0.92  | 0.04    | 0.03    |  |  |
| Na <sub>2</sub> O              | 0.00                     | 0.00    | 0.00    | 0.00    | 0.00    | 1.17  | 1.21  | 1.20  | 0.02    | 0.02                     | 0.37  | 0.01    | 0.00    |  |  |
| K <sub>2</sub> O               | 0.01                     | 0.00    | 0.01    | 0.00    | 0.01    | 0.06  | 0.06  | 0.07  | 0.01    | 0.00                     | 0.16  | 0.02    | 0.01    |  |  |
| NiO                            | 0.04                     | 0.04    | 0.03    | 0.04    | 0.04    | 0.00  | 0.00  | 0.00  | 0.01    | 0.01                     | 0.01  | 0.01    | 0.01    |  |  |
| Total cation                   | 20.26                    | 20.34   | 20.40   | 20.25   | 20.27   | 15.06 | 15.03 | 15.00 | 20.27   | 20.24                    | 18.33 | 20.09   | 20.23   |  |  |

99



Table S3

Result of olivine maximum fractionation model

| Sample name                    | YK18-08  |                         |         |                                       | 6K#1522R17 |                         |         |                                       |
|--------------------------------|----------|-------------------------|---------|---------------------------------------|------------|-------------------------|---------|---------------------------------------|
|                                | Original | 100 normalized original | Primary | Olivine equilibrium with primary melt | Original   | 100 normalized original | Primary | Olivine equilibrium with primary melt |
| wt%                            |          |                         |         |                                       |            |                         |         |                                       |
| SiO <sub>2</sub>               | 45.90    | 47.04                   | 46.42   | 40.16                                 | 45.06      | 46.20                   | 45.75   | 39.96                                 |
| TiO <sub>2</sub>               | 2.51     | 2.57                    | 2.35    | 0.00                                  | 2.67       | 2.74                    | 2.55    | 0.00                                  |
| Al <sub>2</sub> O <sub>3</sub> | 12.82    | 13.14                   | 12.01   | 0.00                                  | 12.55      | 12.87                   | 12.00   | 0.00                                  |
| Cr <sub>2</sub> O <sub>3</sub> | 0.02     | 0.02                    | 0.02    | 0.00                                  | 0.02       | 0.02                    | 0.02    | 0.00                                  |
| FeO*                           | 11.64    | 11.93                   | 12.22   | 13.25                                 | 11.89      | 12.19                   | 12.45   | 14.33                                 |
| MnO                            | 0.16     | 0.17                    | 0.15    | 0.00                                  | 0.18       | 0.18                    | 0.17    | 0.00                                  |
| MgO                            | 7.33     | 7.51                    | 10.73   | 46.28                                 | 7.24       | 7.42                    | 9.91    | 45.42                                 |
| CaO                            | 10.81    | 11.07                   | 10.12   | 0.00                                  | 11.19      | 11.47                   | 10.69   | 0.00                                  |
| Na <sub>2</sub> O              | 4.16     | 4.27                    | 3.90    | 0.00                                  | 4.28       | 4.39                    | 4.09    | 0.00                                  |
| K <sub>2</sub> O               | 1.40     | 1.43                    | 1.31    | 0.00                                  | 1.51       | 1.55                    | 1.44    | 0.00                                  |
| NiO                            | 0.01     | 0.01                    | 0.03    | 0.31                                  | 0.01       | 0.01                    | 0.02    | 0.29                                  |
| P <sub>2</sub> O <sub>5</sub>  | 0.80     | 0.82                    | 0.75    | 0.00                                  | 0.95       | 0.97                    | 0.90    | 0.00                                  |
| Total                          | 97.56    | 100.00                  | 100.00  | 100.00                                | 97.54      | 100.00                  | 100.00  | 100.00                                |

| µg/g | Original | 100 normalized original | Primary | Olivine equilibrium with primary melt | Original | 100 normalized original | Primary | Olivine equilibrium with primary melt |
|------|----------|-------------------------|---------|---------------------------------------|----------|-------------------------|---------|---------------------------------------|
| Li   | 7.69     |                         | 7.03    |                                       | 8.42     |                         | 7.85    |                                       |
| B    | 2.34     |                         | 2.13    |                                       | 2.94     |                         | 2.74    |                                       |
| Sc   | 20.6     |                         | 18.8    |                                       | 20.6     |                         | 19.2    |                                       |
| V    | 208      |                         | 190     |                                       | 209      |                         | 195     |                                       |
| Cr   | 218      |                         | 199     |                                       | 203      |                         | 189     |                                       |
| Co   | 46.8     |                         | 42.7    |                                       | 46.8     |                         | 43.6    |                                       |
| Rb   | 26.9     |                         | 24.6    |                                       | 29.7     |                         | 27.7    |                                       |
| Sr   | 924      |                         | 845     |                                       | 1086     |                         | 1012    |                                       |
| Y    | 26.0     |                         | 23.7    |                                       | 29.6     |                         | 27.6    |                                       |
| Zr   | 168      |                         | 153     |                                       | 194      |                         | 181     |                                       |
| Nb   | 55.3     |                         | 50.5    |                                       | 65.7     |                         | 61.2    |                                       |
| Cs   | 0.35     |                         | 0.32    |                                       | 0.40     |                         | 0.37    |                                       |
| Ba   | 512      |                         | 468     |                                       | 590      |                         | 550     |                                       |
| La   | 49.6     |                         | 45.3    |                                       | 60.9     |                         | 56.7    |                                       |
| Ce   | 101      |                         | 92      |                                       | 122      |                         | 113     |                                       |
| Pr   | 11.3     |                         | 10.3    |                                       | 13.8     |                         | 12.8    |                                       |
| Nd   | 45.5     |                         | 41.6    |                                       | 55.7     |                         | 51.9    |                                       |
| Sm   | 9.60     |                         | 8.77    |                                       | 11.4     |                         | 10.58   |                                       |
| Eu   | 3.13     |                         | 2.86    |                                       | 3.67     |                         | 3.42    |                                       |
| Gd   | 8.27     |                         | 7.55    |                                       | 9.92     |                         | 9.25    |                                       |
| Tb   | 1.08     |                         | 0.99    |                                       | 1.27     |                         | 1.19    |                                       |
| Dy   | 5.94     |                         | 5.42    |                                       | 6.81     |                         | 6.35    |                                       |
| Ho   | 0.97     |                         | 0.88    |                                       | 1.10     |                         | 1.03    |                                       |
| Er   | 2.37     |                         | 2.17    |                                       | 2.63     |                         | 2.45    |                                       |
| Tm   | 0.26     |                         | 0.24    |                                       | 0.30     |                         | 0.28    |                                       |
| Yb   | 1.64     |                         | 1.50    |                                       | 1.75     |                         | 1.63    |                                       |
| Lu   | 0.22     |                         | 0.20    |                                       | 0.22     |                         | 0.21    |                                       |
| Hf   | 3.76     |                         | 3.44    |                                       | 4.36     |                         | 4.07    |                                       |
| Ta   | 2.34     |                         | 2.14    |                                       | 2.77     |                         | 2.58    |                                       |
| Pb   | 3.68     |                         | 3.36    |                                       | 4.29     |                         | 4.00    |                                       |
| Th   | 5.73     |                         | 5.23    |                                       | 7.29     |                         | 6.79    |                                       |
| U    | 1.28     |                         | 1.17    |                                       | 1.58     |                         | 1.48    |                                       |

FeO\* is total iron content as Fe<sup>2+</sup>.104  
105  
106

Table S4 Modelling parameters and results

Modelling parameters

Mineral proportion in solid and melt modes of hypothetical garnet lherzolite

Trace element concentration of references and partition coefficients

|                     | Mineral proportion in solid and melt modes of hypothetical garnet lherzolite |               |               |        | Trace element concentration of references and partition coefficients |                 |                     |                          |                                          |         |        |         |        |
|---------------------|------------------------------------------------------------------------------|---------------|---------------|--------|----------------------------------------------------------------------|-----------------|---------------------|--------------------------|------------------------------------------|---------|--------|---------|--------|
|                     | Olivine                                                                      | Orthopyroxene | Clinopyroxene | Garnet | Concentrations                                                       |                 |                     |                          | Partition coefficients <sup>a,1, g</sup> |         |        |         |        |
|                     |                                                                              |               |               |        | µg/g                                                                 | PM <sup>c</sup> | N-MORB <sup>c</sup> | Carbonatite <sup>d</sup> | 5% N-MORB + 95% PM                       | OI      | Opx    | Cpx     | Grt    |
| Source <sup>a</sup> | 0.55                                                                         | 0.20          | 0.15          | 0.10   | Rb                                                                   | 0.635           | 0.56                | 18.72                    | 0.63                                     | 0.00018 | 0.0006 | 0.011   | 0.0007 |
| Melt <sup>b</sup>   | 0.08                                                                         | -0.19         | 0.81          | 0.30   | Ba                                                                   | 6.989           | 6.3                 | 2628                     | 6.95                                     | 0.0003  | 0.0001 | 0.0005  | 0.0005 |
|                     |                                                                              |               |               |        | Th                                                                   | 0.085           | 0.12                | 54.25                    | 0.09                                     | 0.0001  | 0.0001 | 0.00026 | 0.0001 |
|                     |                                                                              |               |               |        | U                                                                    | 0.021           | 0.047               | 12.16                    | 0.02                                     | 0.0001  | 0.0001 | 0.00036 | 0.0001 |
|                     |                                                                              |               |               |        | Nb                                                                   | 0.713           | 2.33                | 1344                     | 0.79                                     | 0.01    | 0.02   | 0.05    | 0.07   |
|                     |                                                                              |               |               |        | Ta                                                                   | 0.041           | 0.132               | 49.79                    | 0.05                                     | 0.005   | 0.005  | 0.02    | 0.04   |
|                     |                                                                              |               |               |        | La                                                                   | 0.687           | 2.5                 | 1666                     | 0.78                                     | 0.0004  | 0.002  | 0.054   | 0.01   |
|                     |                                                                              |               |               |        | Ce                                                                   | 1.775           | 7.5                 | 2250                     | 2.06                                     | 0.0005  | 0.003  | 0.098   | 0.021  |
|                     |                                                                              |               |               |        | Pr                                                                   | 0.276           | 1.32                | 190.5                    | 0.33                                     | 0.0008  | 0.0048 | 0.15    | 0.054  |
|                     |                                                                              |               |               |        | Sr                                                                   | 21.1            | 90                  | 10088                    | 24.55                                    | 0.00019 | 0.007  | 0.067   | 0.0011 |
|                     |                                                                              |               |               |        | Nd                                                                   | 1.354           | 7.3                 | 535.4                    | 1.65                                     | 0.001   | 0.0068 | 0.21    | 0.087  |
|                     |                                                                              |               |               |        | Zr                                                                   | 11.2            | 74                  | 67.76                    | 14.34                                    | 0.01    | 0.03   | 0.1     | 0.32   |
|                     |                                                                              |               |               |        | Hf                                                                   | 0.309           | 2.05                | 0.61                     | 0.40                                     | 0.01    | 0.01   | 0.233   | 0.23   |
|                     |                                                                              |               |               |        | Sm                                                                   | 0.444           | 2.63                | 55.3                     | 0.55                                     | 0.0013  | 0.01   | 0.26    | 0.217  |
|                     |                                                                              |               |               |        | Eu                                                                   | 0.168           | 1.02                | 13.19                    | 0.21                                     | 0.0016  | 0.013  | 0.31    | 0.32   |
|                     |                                                                              |               |               |        | Ti                                                                   | 1300            | 7600                | 323.6                    | 1615                                     | 0.006   | 0.024  | 0.4     | 0.6    |
|                     |                                                                              |               |               |        | Gd                                                                   | 0.596           | 3.68                | 31.48                    | 0.75                                     | 0.0015  | 0.016  | 0.3     | 0.498  |
|                     |                                                                              |               |               |        | Tb                                                                   | 0.108           | 0.67                | 3.67                     | 0.14                                     | 0.0015  | 0.019  | 0.31    | 0.75   |
|                     |                                                                              |               |               |        | Dy                                                                   | 0.737           | 4.55                | 17.21                    | 0.93                                     | 0.0017  | 0.022  | 0.33    | 1.06   |
|                     |                                                                              |               |               |        | Y                                                                    | 4.55            | 28                  | 90.06                    | 5.72                                     | 0.005   | 0.01   | 0.4     | 3.1    |
|                     |                                                                              |               |               |        | Ho                                                                   | 0.164           | 1.01                | 2.99                     | 0.21                                     | 0.0016  | 0.026  | 0.31    | 1.53   |
|                     |                                                                              |               |               |        | Er                                                                   | 0.48            | 2.97                | 7.27                     | 0.60                                     | 0.0015  | 0.03   | 0.3     | 2      |
|                     |                                                                              |               |               |        | Yb                                                                   | 0.493           | 3.05                | 5.24                     | 0.62                                     | 0.0015  | 0.049  | 0.28    | 4.03   |
|                     |                                                                              |               |               |        | Lu                                                                   | 0.074           | 0.455               | 0.71                     | 0.09                                     | 0.0015  | 0.06   | 0.28    | 5.5    |

<sup>a</sup>c Trace element concentration of PM (primitive mantle) and N-MORB are from Sun and McDonough (1989)<sup>d</sup>d Trace element concentration of carbonatite is from "Average carbonatite" of Bizimis et al. (2003)<sup>e</sup>e Partition coefficients of each mineral are from McKenzie and O'Nions (1991), <sup>f</sup>f Ti for Cpx and Grt are from Kelemen et al. (2003), <sup>g</sup>g Y for each mineral are from White (2013)107  
108

Results of melting model using the OSM-4 of Ozawa et al. (2001)<sup>h</sup>

Table with 20 columns for degrees of melting (0.02 to 0.18) and 20 rows for elements (Rb, Ba, Th, U, Nb, Ta, La, Ce, Pr, Sr, Nd, Zr, Hf, Sm, Eu, Ti, Gd, Tb, Dy, Y, Ho, Er, Yb, Lu). It compares two models: one with a source of 0.05 N-MORB + 0.95 PM and another with a source of 0.05 N-MORB + 0.95 PM, carbonatite influx rate (β): 0.1, melt separation rate (γ): 1.0.

These results were "total melt" as a value considering of instantaneous melt and accumulated melt.

References

List of references including Johnson, K.T.M., Dick, H.J.B., and Shimizu, N. (1990) Melting in the oceanic upper mantle; An ion microprobe study of diopside in abyssal peridotites. J. Geophys. Res., 95, 2661-2678. https://doi.org/10.1029/B095iB03p02661

Results of melting model using the OSM-4 of Ozawa et al. (2001)<sup>h</sup>

Table with 20 columns for degrees of melting (0.02 to 0.18) and 20 rows for elements (Rb, Ba, Th, U, Nb, Ta, La, Ce, Pr, Sr, Nd, Zr, Hf, Sm, Eu, Ti, Gd, Tb, Dy, Y, Ho, Er, Yb, Lu). It compares two models: one with a source of PM, carbonatite influx rate (β): 0.1, melt separation rate (γ): 0.1, and another with a source of PM, carbonatite influx rate (β): 0.1, melt separation rate (γ): 1.0.

Results of melting model using the OSM-4 of Ozawa et al. (2001)<sup>h</sup>

Table with 20 columns for degrees of melting (0.02 to 0.18) and 20 rows for elements (Rb, Ba, Th, U, Nb, Ta, La, Ce, Pr, Sr, Nd, Zr, Hf, Sm, Eu, Ti, Gd, Tb, Dy, Y, Ho, Er, Yb, Lu). It compares two models: one with a source of 0.05 N-MORB + 0.95 PM, carbonatite influx rate (β): 1.0, melt separation rate (γ): 0.1, and another with a source of PM (non-modal batch melting<sup>1</sup>).

Results of melting model using the OSM-4 of Ozawa et al. (2001)\*h

Source: 0.05 N-MORB + 0.95 PM, carbonatite influx rate ( $\beta$ ): 0.03, melt separation rate ( $\gamma$ ): 0.1

|                 | 0.02  | 0.03  | 0.04  | 0.05  | 0.06  | 0.07 | 0.08 | 0.09 | 0.1  | 0.15 | 0.18 |
|-----------------|-------|-------|-------|-------|-------|------|------|------|------|------|------|
| $\mu\text{g/g}$ |       |       |       |       |       |      |      |      |      |      |      |
| Rb              | 28.9  | 19.9  | 15.3  | 12.4  | 10.5  | 9.1  | 8.1  | 7.2  | 6.6  | 4.6  | 3.9  |
| Ba              | 376   | 276   | 226   | 196   | 176   | 162  | 151  | 143  | 136  | 117  | 110  |
| Th              | 5.05  | 3.88  | 3.31  | 2.96  | 2.73  | 2.56 | 2.44 | 2.35 | 2.27 | 2.04 | 1.96 |
| U               | 1.27  | 0.96  | 0.81  | 0.72  | 0.66  | 0.61 | 0.58 | 0.56 | 0.54 | 0.48 | 0.46 |
| Nb              | 27.7  | 30.2  | 31.9  | 33.2  | 34.2  | 35.0 | 35.6 | 36.1 | 36.5 | 38.0 | 38.5 |
| Ta              | 1.99  | 1.86  | 1.79  | 1.74  | 1.70  | 1.68 | 1.66 | 1.64 | 1.63 | 1.58 | 1.57 |
| La              | 43.9  | 45.6  | 46.7  | 47.4  | 47.9  | 48.2 | 48.5 | 48.8 | 48.9 | 49.5 | 49.7 |
| Ce              | 75.5  | 74.6  | 74.1  | 73.7  | 73.4  | 73.2 | 73.0 | 72.9 | 72.7 | 72.4 | 72.2 |
| Pr              | 8.23  | 7.94  | 7.73  | 7.57  | 7.44  | 7.34 | 7.26 | 7.19 | 7.13 | 6.93 | 6.85 |
| Sr              | 894   | 755   | 669   | 611   | 569   | 537  | 512  | 492  | 476  | 424  | 406  |
| Nd              | 31.0  | 29.6  | 28.4  | 27.5  | 26.8  | 26.1 | 25.6 | 25.2 | 24.8 | 23.4 | 22.8 |
| Zr              | 191   | 172   | 157   | 144   | 133   | 124  | 115  | 108  | 102  | 79   | 70   |
| Hf              | 4.92  | 4.51  | 4.15  | 3.85  | 3.59  | 3.36 | 3.16 | 2.98 | 2.82 | 2.22 | 1.96 |
| Sm              | 7.29  | 6.86  | 6.49  | 6.17  | 5.90  | 5.66 | 5.45 | 5.26 | 5.09 | 4.46 | 4.20 |
| Eu              | 2.25  | 2.14  | 2.05  | 1.96  | 1.89  | 1.82 | 1.76 | 1.70 | 1.65 | 1.45 | 1.36 |
| Ti              | 11679 | 11262 | 10874 | 10511 | 10170 | 9849 | 9547 | 9262 | 8993 | 7842 | 7276 |
| Gd              | 6.83  | 6.55  | 6.29  | 6.06  | 5.85  | 5.66 | 5.48 | 5.32 | 5.17 | 4.55 | 4.27 |
| Tb              | 1.00  | 0.97  | 0.94  | 0.92  | 0.89  | 0.87 | 0.85 | 0.83 | 0.81 | 0.73 | 0.69 |
| Dy              | 5.51  | 5.40  | 5.29  | 5.19  | 5.10  | 5.01 | 4.92 | 4.84 | 4.76 | 4.41 | 4.22 |
| Y               | 15.5  | 15.7  | 15.9  | 16.0  | 16.2  | 16.4 | 16.5 | 16.7 | 16.9 | 17.8 | 18.4 |
| Ho              | 0.98  | 0.97  | 0.96  | 0.95  | 0.94  | 0.93 | 0.92 | 0.91 | 0.90 | 0.86 | 0.84 |
| Er              | 2.38  | 2.37  | 2.36  | 2.35  | 2.34  | 2.33 | 2.32 | 2.32 | 2.31 | 2.27 | 2.24 |
| Yb              | 1.39  | 1.41  | 1.42  | 1.44  | 1.45  | 1.47 | 1.49 | 1.50 | 1.52 | 1.62 | 1.68 |
| Lu              | 0.16  | 0.16  | 0.16  | 0.17  | 0.17  | 0.17 | 0.18 | 0.18 | 0.18 | 0.20 | 0.21 |
